# Supplementary material
Source: publisher figshare collection journal article supplement (https://gsapubs.figshare.com/ndownloader/files/27693162)
Supplement: Supplementary file 1 [file 27693162]

## Sheet: A. TM
	Ten Mile Graben, UT
	Js		3Jmt		Jsw							Js		3Jmt		Jsw
	153	3.09667	256	3.07821	169	9.05794					Cordilleran back arc	153	0.0198504	256	0.0139919	169	0.0365239
	316	5.01105	333	5.01311	194	4.009		Cordilleran back arc	145-165			316	0.0321221	333	0.0227869	194	0.0161653
	355	8.00745	413	25.0062	334	7.01295		Cordilleran arc	181-241			355	0.0513298	413	0.113665	334	0.028278
	414	18.0108	597	24.0036	369	13.0054		Paleozoic Appalachian	285-504			414	0.115454	597	0.109107	369	0.0524411
	544	10.0081	689	3.00372	414	34.0093		McClure Mtn. Syenite	512-529			544	0.0641545	689	0.0136533	414	0.137134
	620	19.0038	1027	33.0038	524	6.01232		Neoproterozoic Appalachian	530-723			620	0.121819	1027	0.150017	524	0.0242432
	1050	32.0033	1157	29.0066	591	15.0055		Unknown	750-880			1050	0.20515	1157	0.131848	591	0.0605062
	1219	16.0035	1267	14.0105	627	13.0066		Grenville	900-1300			1219	0.102586	1267	0.0636842	627	0.052446
	1320	8.00354	1326	12.0045	1036	47.0039		Anorogenic Craton	1300-1530			1320	0.0513048	1326	0.0545657	1036	0.189532
	1373	7.00807	1465	9.00224	1146	41.0023		Yavapai-Mazatzal	1550-1800			1373	0.0449235	1465	0.0409193	1146	0.165332
	1461	7.00301	1518	7.00512	1364	9.00226		Paleoproterozoic	1800-2000			1461	0.0448911	1518	0.0318415	1364	0.0362994
	1725	6.01656	1619	17.0046	1454	14.0034		Wopmay orogen	2000-2300			1725	0.0385677	1619	0.0772938	1454	0.0564653
	1840	4.0105	1727	6.0062	1667	9.00245		Archean craton	2400-3200			1840	0.0257083	1727	0.0273009	1667	0.0363002
	1880	3.00402	1806	7.0012	1769	13.0034		Unknown	>3200			1880	0.0192566	1806	0.0318236	1769	0.052433
	1965	3.01561	1865	4.01614	2014	8.01009						1965	0.0193309	1865	0.0182552	2014	0.0322988
	2696	7.00335	1968	4.00887	2755	6.00456						2696	0.0448932	1968	0.0182222	2755	0.024212
			1992	4.01506										1992	0.0182503
			2044	3.01903										2044	0.0137229
			2140	4.01507										2140	0.0182503
			2708	3.017										2708	0.0137137
			2745	4.00508										2745	0.0182049
		156.209		220.246		248.151
													25		4		16

## Sheet: B. DB
Dewey Bridge, UT
1Jes		2Jw		3Jmt		4Jmt		5Jsw			1Jes	%	2Jw	%	3Jmt	%	4Jmt	%	5Jsw	%
426	6.01219	165	3.05794	327	3.01938	338	5.03947	235	8.04033		426	0.100203	165	0.0210892	327	0.015484	338	0.057925	235	0.0528969		Cordilleran back arc	145-165
523	6.02539	378	9.01431	368	7.03025	372	4.00675	248	11.009		523	0.100423	378	0.0621677	368	0.0360525	372	0.0460546	248	0.0724276		Cordilleran arc	181-241
599	5.00907	421	8.01367	413	19.0251	425	6.01332	287	3.00675		599	0.0834845	421	0.0552667	413	0.0975646	425	0.0691186	287	0.0197812		Paleozoic Appalachian	285-504
935	4.01347	526	12.0241	520	11.0257	458	3.00913	401	9.02391		935	0.0668911	526	0.0829252	520	0.0565419	458	0.0345877	401	0.0593678		McClure Mtn. Syenite	512-529
1039	9.00607	616	21.0098	615	14.0066	526	4.02804	537	6.01367		1039	0.150101	616	0.144895	615	0.0718289	526	0.0462994	537	0.0395636		Neoproterozoic Appalachian	530-723
1138	10.0091	1036	23.0033	1028	39.0031	556	4.03683	592	14.0158		1138	0.166819	1036	0.158644	1028	0.200016	556	0.0464003	592	0.092209		Unknown	750-880
1409	9.00589	1164	18.0029	1168	19.0027	594	4.02318	1043	30.0026		1409	0.150098	1164	0.124158	1168	0.0974497	594	0.0462434	1043	0.197385		Grenville	900-1300
1663	7.01098	1305	7.00421	1218	18.0038	635	5.00829	1162	14.0037		1663	0.11685	1305	0.0483049	1218	0.0923274	635	0.0575666	1162	0.0921295		Anorogenic Craton	1300-1530
1880	4.01232	1465	10.0076	1364	10.0038	1021	14.0063	1283	7.00149		1880	0.066872	1465	0.069018	1364	0.0513018	1021	0.160992	1283	0.0460625		Yavapai-Mazatzal	1550-1800
		1575	5.01715	1439	17.0041	1148	7.02266	1386	9.0047				1575	0.034601	1439	0.0872005	1148	0.0807202	1386	0.0592415		Paleoproterozoic	1800-2000
		1652	5.00716	1696	17.0036	1225	4.01866	1442	16.003				1652	0.0345321	1696	0.087198	1225	0.0461914	1442	0.105283		Wopmay orogen	2000-2300
		1707	5.00989	1765	9.00902	1277	3.01207	1650	7.00845				1707	0.0345509	1765	0.0462001	1277	0.0346214	1650	0.0461082		Archean craton	2400-3200
		1876	7.00285	1897	3.00719	1350	3.00951	1749	4.00475				1876	0.0482955	1897	0.0154215	1350	0.034592	1749	0.0263471		Unknown	>3200
		2028	3.02008	2645	3.02934	1425	4.00445	1975	3.01094				2028	0.0208281	2645	0.0155351	1425	0.0460282	1975	0.0198088
		2087	3.01613	2677	3.01257	1470	3.00495	2038	3.02101				2087	0.0208009	2677	0.0154491	1470	0.0345396	2038	0.019875
		2708	6.01852	2731	3.02349	1628	4.01177	2700	5.00929				2708	0.041507	2731	0.0155051	1628	0.0461123	2700	0.0329559
						1690	4.00315	2763	3.00445								1690	0.0460132	2763	0.0197661
						1888	3.01877										1888	0.0346985
						2756	3.00998										2756	0.0345975
	60.1045		145.23		195.21		87.2873		152.184

## Sheet: C. RV
Rabbit Valley, CO
1Jes		1Jebb		2Jebb		3Jebb		1Jw		1Jmt			1Jes		1Jebb		2Jebb		3Jebb		1Jw		1Jmt
165	5.03125	251	3.05868	236	3.01332	164	4.07365	158	6.06664	161	3.09667		165	0.0222622	251	0.0140953	236	0.0135126	164	0.0169736	158	0.0226367	161	0.0120964		Cordilleran back arc	145-165
209	5.03884	307	5.01295	315	3.03332	237	3.01078	343	7.00491	173	3.06664		209	0.0222957	307	0.0231012	315	0.0136023	237	0.0125449	343	0.0261377	173	0.0119791		Cordilleran arc	181-241
249	10.0108	412	6.01332	417	22.0123	284	5.01311	379	9.0054	248	5.03457		249	0.0442956	412	0.0277111	417	0.09871	284	0.020888	379	0.0336022	248	0.0196663		Paleozoic Appalachian	285-504
361	9.00695	447	4.00619	512	70.0072	375	8.00491	402	7.01431	344	4.03276		361	0.0398537	447	0.0184617	512	0.313934	375	0.0333538	402	0.0261728	344	0.015753		McClure Mtn. Syenite	512-529
414	12.013	516	58.0049	618	8.00349	422	15.0049	455	8.00695	408	14.0122		414	0.0531547	516	0.267304	618	0.0358901	422	0.0625205	455	0.0298767	408	0.0547351		Neoproterozoic Appalachian	530-723
530	9.00586	588	14.0119	1046	35.002	530	31.0066	518	9.03123	447	9.01577		530	0.0398489	588	0.0645711	1046	0.15696	530	0.129194	518	0.0336986	447	0.0352179	Grenville	Unknown	750-880
600	21.0034	1061	30.005	1322	11.0075	609	12.0032	596	15.0046	605	17.0039		600	0.0929353	1061	0.138272	1322	0.0493611	609	0.0500132	596	0.0559872	605	0.0664213		Grenville	900-1300
932	4.01922	1150	21.0049	1436	22.0086	1041	52.0033	1024	53.0028	1020	44.0025		932	0.0177841	1150	0.0967969	1436	0.0986934	1041	0.21668	1024	0.197771	1020	0.171885		Anorogenic Craton	1300-1530
1053	32.0047	1253	3.01633	1613	10.0114	1165	26.0036	1062	49.003	1072	45.0026		1053	0.141614	1253	0.0139001	1613	0.0448943	1165	0.108348	1062	0.182847	1072	0.175791		Yavapai-Mazatzal	1550-1800
1132	19.0012	1444	12.004	1675	14.0046	1269	5.00961	1154	27.0022	1206	13.0023		1132	0.0840759	1444	0.0553179	1675	0.0628011	1269	0.0208734	1154	0.100755	1206	0.0507903		Paleoproterozoic	1800-2000
1182	14.0049	1489	9.00315	1757	8.00444	1319	7.00476	1222	13.0041	1272	6.00225		1182	0.0619685	1489	0.0414892	1757	0.0358943	1319	0.0291865	1222	0.0485227	1272	0.0234463		Wopmay orogen	2000-2300
1250	10.0015	1546	5.02051	1834	10.0025	1427	17.0051	1337	10.007	1369	9.00444		1250	0.0442546	1546	0.023136	1834	0.0448544	1427	0.0708546	1337	0.0373394	1369	0.0351736		Archean craton	2400-3200
1327	9.00495	1707	21.0034	2449	4.01635	1691	15.0036	1480	13.003	1465	29.0062		1327	0.0398449	1707	0.0967897	2449	0.0180106	1691	0.062515	1480	0.0485187	1465	0.113306		Unknown	>3200
1366	8.00503	1846	7.00423	2649	3.00476	1803	8.01054	1622	12.006	1613	12.0047		1366	0.0354205	1846	0.0322776	2649	0.0134742	1803	0.0333772	1622	0.0447985	1613	0.0468934
1455	12.0102	2100	5.01149			1876	9.01232	1807	11.0172	1644	14.0039		1455	0.0531423	2100	0.0230944			1876	0.0375513	1807	0.041109	1644	0.0547026
1639	15.0066	2663	7.00495			1953	5.00357	1991	8.01448	1804	13.0047		1639	0.066401	2663	0.0322809			1953	0.0208482	1991	0.0299048	1804	0.0507997
1767	13.0059	2699	7.01257			2060	3.01933	2612	4.01899	1981	4.01933		1767	0.0575483	2699	0.032316			2060	0.0125806	2612	0.0149962	1981	0.0157005
1869	6.00303					2670	6.01792	2700	4.01829	2044	5.00316		1869	0.0265621					2670	0.0250747	2700	0.0149936	2044	0.0195436
1983	4.01638					2735	6.02129	2818	3.00318	2119	4.02247		1983	0.0177716					2735	0.0250887	2818	0.0112059	2119	0.0157128
2079	3.022					2857	3.02145			2688	3.00553		2079	0.0133717					2857	0.0125894			2688	0.0117403
2608	3.00866												2608	0.0133127
2679	3.02318												2679	0.0133769
	226.247		217.198		223.132		240.254		268.234		256.347

## Sheet: D. PB
Pollock Bench, CO
1Jbb		2Jw		4Jw		3Jmt		5Jmt		Jsw						1Jbb		2Jw		4Jw		3Jmt		5Jmt		Jsw
				PEAK AGE	# GRAINS															PEAK AGE	% # GRAINS
220	4.0629	327	6.04648	162	4.05467	242	5.03764	158	4.09667	217	3.12579		Cordilleran back arc	145-165		220	0.0153898	327	0.0416999	162	0.0187716	242	0.0220949	158	0.0202805	217	0.0148142
307	6.02595	379	10.0111	174	3.03238	336	10.0067	212	3.06664	341	4.05199		Cordilleran arc	181-241		307	0.0228256	379	0.0690417	174	0.0140388	336	0.0438892	212	0.0151814	341	0.0192037
342	3.03332	411	13.0066	185	3.08802	372	9.00526	234	8.01332	422	30.0067		Paleozoic Appalachian	285-504		342	0.0114899	411	0.0897004	185	0.0142964	372	0.0394968	234	0.0396699	422	0.142212
385	7.02145	530	9.01418	247	3.07365	417	9.02349	313	4.04401	471	8.01822		McClure Mtn. Syenite	512-529		385	0.0265964	530	0.0621668	247	0.0142299	417	0.0395767	313	0.0200198	471	0.0380011
430	16.0137	594	7.01721	261	4.0391	527	9.01177	337	4.01614	567	14.0118		Neoproterozoic Appalachian	530-723		430	0.0606578	594	0.0483945	261	0.0186996	527	0.0395253	337	0.0198819	567	0.0664065
520	39.0051	1038	40.0031	371	16.018	596	20.0058	375	14.0269	616	14.0083		Unknown	750-880		520	0.147747	1038	0.275883	371	0.0741576	596	0.0877447	375	0.06944	616	0.0663902
600	12.0047	1130	22.0021	419	30.0074	862	3.01549	407	4.02607	733	4.02221		Grenville	900-1300		600	0.0454722	1130	0.151738	419	0.138923	862	0.0132259	407	0.019931	733	0.0190626
1030	52.0027	1432	10.0093	567	14.0072	1047	37.0026	454	7.02283	1041	42.0035		Anorogenic Craton	1300-1530		1030	0.19698	1432	0.0690296	567	0.0648481	1047	0.162292	454	0.0347665	1041	0.199069
1159	31.0027	1628	10.0051	606	22.0036	1160	34.0051	549	15.0041	1139	18.0078		Yavapai-Mazatzal	1550-1800		1159	0.117434	1628	0.0690007	606	0.101869	1160	0.149145	549	0.0742777	1139	0.0853449
1245	17.0033	1803	6.0134	675	3.03048	1358	14.0107	616	16.0112	1306	7.01094		Paleoproterozoic	1800-2000		1245	0.0644065	1803	0.0414718	675	0.01403	1358	0.0614506	616	0.0792635	1306	0.0332272
1438	20.0032	2120	4.02054	1040	33.0037	1420	10.0049	1030	50.0027	1380	10.0021		Wopmay orogen	2000-2300		1438	0.0757695	2120	0.0277278	1040	0.152795	1420	0.0438813	1030	0.247538	1380	0.0474031
1553	4.01601	2627	3.0172	1168	12.0017	1478	11.0055	1193	16.0018	1496	13.0094		Archean craton	2400-3200		1553	0.0152121	2627	0.0208083	1168	0.0555634	1478	0.0482697	1193	0.0792168	1496	0.0616559
1635	13.0127	2684	5.01775	1312	5.0105	1570	4.00557	1439	18.0059	1641	7.01324		Unknown	>3200		1635	0.0492907	2684	0.0346052	1312	0.0231968	1570	0.0175683	1439	0.0891384	1641	0.0332381
1767	11.004			1463	13.0041	1649	12.0105	1634	16.0027	1671	7.00925					1767	0.0416819			1463	0.0602041	1649	0.0526776	1634	0.0792213	1671	0.0332192
1877	9.00441			1496	12.0071	1718	13.0068	1766	7.00891	1741	6.00821					1877	0.0341076			1496	0.0555884	1718	0.0570475	1766	0.0346976	1741	0.0284749
2084	4.00935			1543	5.00335	1901	6.01192	1874	7.00395	1802	4.02607					2084	0.0151869			1543	0.0231636	1901	0.0263681	1874	0.034673	1802	0.0190809
2493	4.01149			1615	11.0134	2010	5.01607	2097	6.00503	1867	7.01473					2493	0.0151951			1615	0.0509882	2010	0.0220003	2097	0.0297279	1867	0.0332452
2656	4.0114			1677	5.00574	2065	6.00961	2717	3.00661	1987	4.02033					2656	0.0151947			1677	0.0231747	2065	0.0263579	2717	0.0148842	1987	0.0190537
2738	5.01143			1764	7.01931	2519	4.00474			2084	4.01974					2738	0.0189827			1764	0.0324968	2519	0.0175646			2084	0.0190509
2818	3.00476			1944	3.02101	2641	3.02385			2686	5.01752					2818	0.0113817			1944	0.0139861	2641	0.0132625			2686	0.0237797
				2123	4.00665	2691	4.00511													2123	0.0185493	2691	0.0175663
				2720	4.0242															2720	0.0186306
	264.265		145.184		216.475		228.229		202.366		211.408

## Sheet: X. EC
Escalante Canyon, CO			Potter McIntyre et al., 2016 data									Escalante Canyon
EC-Jebb			DB-1Jeef			2Jw			3Jw			1Jmt			2Jmt			Jms
			PEAK AGE	# GRAINS																			EC-Jebb		DB-1Jeef		2Jw		3Jw		1Jmt		2Jmt		Jms
165	3.026		386	3.04033		527	75.0183		419	4.02689		426	5.01683		299	3.12579		167	6.02595	Wet Mountain Complex					PEAK AGE	# GRAINS
443	4.04016		408	3.04648		1099	4.00722		523	59.0147		523	13.0097		304	4.018		176	7.00951	1.660-1.7			165	0.0315208	386	0.0266695	527	0.652333	419	0.037286	426	0.0432486	299	0.0297695	167	0.0456511			145-165
465	5.03123		418	3.01332		1157	3.00363		569	3.00703		637	4.00656		369	6.01105		238	3.13298	1.440-1.485			443	0.042085	408	0.0267235	1099	0.0348454	523	0.546433	523	0.112152	304	0.0382666	176	0.0531023			181-241
541	5.0106		456	4.00913		1435	12.0092		1008	3.00565		946	10.0441		414	8.00639		331	4.01942	1.36-1.37			465	0.0524086	418	0.0264326	1157	0.0261185	569	0.0278429	637	0.0345393	369	0.0572481	238	0.0237347			285-504
577	4.04699		479	4.05699		1498	7.00287		1098	4.0021		1034	23.003		435	5.00582		374	5.03025	1.06			541	0.0521938	456	0.0351678	1435	0.104428	1008	0.0278301	946	0.0865867	414	0.0762513	331	0.0304501			512-529
997	18.0035		519	20.0532		1667	6.04193		1160	4.00163		1134	12.0008		471	4.05641		413	9.00282	523-540			577	0.0421561	479	0.0355876	1498	0.0608945	1098	0.0370564	1034	0.198302	435	0.0476744	374	0.0381079			530-723
1047	25.0021		562	6.00473		1698	5.00536		1225	4.03494		1171	7.00122		548	3.03145		459	5.00969				997	0.187537	519	0.175906	1667	0.0525385	1160	0.0370522	1134	0.103455	471	0.0386325	413	0.0682032			750-880
1234	12.0008		599	4.0034		1801	3.00098		1251	4.02842		1242	7.00099		599	5.00491		567	5.00749				1047	0.260439	562	0.052673	1698	0.0435248	1225	0.0373606	1171	0.0603553	548	0.0288709	459	0.0379522			900-1300
1389	3.00284		672	3.006					1433	6.00508		1338	8.00244		1058	20.0031		593	7.00926				1234	0.125009	599	0.0351175	1801	0.0260955	1251	0.0373002	1242	0.0603534	599	0.0476658	567	0.0379355			1300-1530
1594	3.00503		982	4.01728					1516	3.00172		1447	9.00351		1166	14.0009		622	7.00473				1389	0.0312795	672	0.0263684			1433	0.0556026	1338	0.0689866	1058	0.190505	593	0.0531005			1550-1800
1692	6.00313		1013	6.0062					1687	4.00241		1691	5.00479		1270	6.0024		1001	12.0048				1594	0.0313024	982	0.0352393			1516	0.0277937	1447	0.0776165	1166	0.133342	622	0.0530661			1800-2000
1735	5.00337		1072	14.0027					1744	3.00712		1752	4.00119		1340	4.00122		1052	13.0023				1692	0.0625327	1013	0.0526859			1687	0.0370594	1691	0.0431447	1270	0.0571657	1001	0.0909452			2000-2300
2066	3.02785		1157	13.0044					1809	3.00407		1801	5.01483		1460	5.00389		1142	12.0017				1735	0.0521185	1072	0.12283			1744	0.0278437	1752	0.034493	1340	0.0381068	1052	0.0985022			2400-3200
			1360	6.00134					1834	4.00353		1829	4.01219		1490	5.00229		1254	5.00075				2066	0.0315401	1157	0.114074			1809	0.0278155	1801	0.0432313	1460	0.0476561	1142	0.0909223			>3200
			1444	6.00164											1706	4.00262		1359	4.00279						1360	0.0526433			1834	0.0370697	1829	0.0345878	1490	0.0476408	1254	0.0378845
			1554	4.00129											1747	3.0016		1419	6.00245						1444	0.0526459							1706	0.0381202	1359	0.0303242
			1663	4.00457											1798	3.00383		1457	5.00876						1554	0.035099							1747	0.0285866	1419	0.0454731
			1691	4.02927											1885	3.0391		1476	6.00489						1663	0.0351278							1798	0.0286079	1457	0.0379451
			1746	3.0069														1563	4.00483						1691	0.0353445							1885	0.0289439	1476	0.0454916
																		1635	4.02927						1746	0.0263763									1563	0.0303396
																		1683	3.00443																1635	0.0305248
	96.2037			114.309			115.089			108.145			116.122			105.321			132.319																1683	0.0227608
EC-Jebb			DB-1Jeef			2Jw			3Jw			1Jmt			2Jmt			Jms
MIN AGE	MAX AGE	# GRAINS	MIN AGE	MAX AGE	# GRAINS	MIN AGE	MAX AGE	# GRAINS	MIN AGE	MAX AGE	# GRAINS	MIN AGE	MAX AGE	# GRAINS	MIN AGE	MAX AGE	# GRAINS	MIN AGE	MAX AGE	# GRAINS
153	177	3	379	400	3	480	564	76	409	429	3	410	446	5	299	311	2	159	183	7
278	286	0	407	427	3	1020	1187	4	470	580	62	482	574	13	341	346	0	219	244	2
324	330	1	443	614	28	1356	1524	13	941	1352	12	588	605	0	353	486	19	326	489	20
438	492	7	651	672	1	1618	1809	8	1394	1529	7	617	652	3	533	568	3	548	656	9
497	556	5	949	1597	38				1629	1754	4	854	1605	51	572	622	6	852	1317	24
565	601	4	1640	1714	4			101	1787	1861	4	1638	1644	1	870	1530	37	1322	1588	12
797	1340	37	1736	1756	1							1651	1764	5	1577	1584	0	1590	1694	5
1351	1422	1									92	1788	1840	5	1635	1753	5
1479	1511	1			78										1787	1839	3			79
1527	1539	1												83	1864	1902	3
1581	1599	1													2758	2763	0
1669	1772	8
2052	2084	3															78
		72

## Sheet: E. DT
Duncan Trail, CO
DT-1Jes		DT-1Jw		DT-2Jw		DT-1Jmt						DT-1Jes		DT-1Jw		DT-2Jw		DT-1Jmt
355	3.12579	168	3.17603	243	3.12579	156	9.06476		Cordilleran back arc	145-165		355	0.0161958	168	0.0115914	243	0.014017	156	0.0323741
426	5.03884	251	3.03316	276	3.09667	223	5.018		Cordilleran arc	181-241		426	0.026108	251	0.0110699	276	0.0138864	223	0.0179214
453	10.0222	261	5.04566	309	4.07528	254	3.09667		Paleozoic Appalachian	285-504		453	0.0519284	261	0.0184148	309	0.0182748	254	0.0110595
803	3.03521	332	4.12579	328	4.06664	273	4.04566		McClure Mtn. Syenite	512-529		803	0.0157265	332	0.0150576	328	0.0182361	273	0.0144488
1053	81.0033	375	4.07528	354	5.08066	293	3.08802		Neoproterozoic Appalachian	530-723		1053	0.419706	375	0.0148733	354	0.0227832	293	0.0110286
1160	67.0027	404	8.03238	377	6.05794	310	6.01658		Unknown	750-880		1160	0.347164	404	0.0293153	377	0.0271656	310	0.0214878
1316	17.0027	417	6.04839	398	4.07365	319	4.02995		Grenville	900-1300		1316	0.088097	417	0.0220744	398	0.0182675	319	0.0143927
1480	7.01538	428	8.009	416	6.00771	347	3.04841		Anorogenic Craton	1300-1530		1480	0.0363491	428	0.0292299	416	0.0269404	347	0.0108872
		457	9.01239	435	6.02734	377	5.06664		Yavapai-Mazatzal	1550-1800				457	0.0328919	435	0.0270284	377	0.0180952
		482	3.07821	461	5.07821	402	16.0074		Paleoproterozoic	1800-2000				482	0.0112343	461	0.0227722	402	0.0571694
		524	13.0077	519	49.022	420	10.0124		Wopmay orogen	2000-2300				524	0.0474734	519	0.21983	420	0.0357585
		549	5.02494	551	4.01311	441	7.00675		Archean craton	2400-3200				549	0.0183392	551	0.017996	441	0.0250241
		573	4.06664	578	8.01332	458	4.02159		Unknown	>3200				573	0.0148418	578	0.0359342	458	0.0143628
		617	15.0091	616	8.01109	509	4.04416							617	0.0547778	616	0.0359242	509	0.0144434
		713	3.03401	635	8.01562	548	6.02349							713	0.011073	635	0.0359445	548	0.0215125
		1053	50.0029	1015	26.0025	563	6.00771							1053	0.182492	1015	0.116603	563	0.0214561
		1154	37.0014	1155	24.0037	603	12.0094							1154	0.135042	1155	0.10764	603	0.0428907
		1254	10.0095	1333	5.01407	645	13.0049							1254	0.0365311	1333	0.0224846	645	0.0464461
		1340	16.0044	1427	20.0038	902	3.02179							1340	0.0584101	1427	0.0897032	902	0.0107921
		1432	27.004	1536	3.00747	1036	23.0044							1432	0.0985548	1536	0.0134864	1036	0.0821586
		1608	8.00759	1712	18.0049	1087	19.0041							1608	0.0292248	1712	0.0807394	1087	0.0678719
		1673	8.00508	1862	3.02307	1189	24.0051							1673	0.0292156	1862	0.0135564	1189	0.0857326
		1746	10.0055			1314	9.0127							1746	0.0365165			1314	0.0321882
		1805	4.01728			1365	10.005							1805	0.0146616			1365	0.035732
		1854	7.0213			1448	10.0068							1854	0.0256252			1448	0.0357387
		2526	3.02759			1510	10.0039							2526	0.0110496			1510	0.0357284
						1626	14.0086											1626	0.0500306
						1747	7.01175											1747	0.025042
						1884	12.0027											1884	0.0428667
						1970	5.0036											1970	0.01787
						2104	7.0115											2104	0.0250411
						2472	3.00789											2472	0.0107424
						2729	3.02636											2729	0.0108084
	193.246		273.885		222.825		279.749						46		26		55		23

## Sheet: T. CT
Chukar Trail, CO
1Jes		2Jw				1Jes	%	2Jw	%
166	5.06049	161	4.08802			166	0.0219069	161	0.0185819		Cordilleran back arc	145-165
214	6.02966	252	6.04699			214	0.0261024	252	0.0274863		Cordilleran arc	181-241
256	9.02494	308	5.03367			256	0.039069	308	0.0228803		Paleozoic Appalachian	285-504
337	5.04102	334	5.04699			337	0.0218226	334	0.0229408		McClure Mtn. Syenite	512-529
361	7.00586	367	14.0111			361	0.0303284	367	0.0636866		Neoproterozoic Appalachian	530-723
407	14.021	406	17.0074			407	0.060697	406	0.0773066		Unknown	750-880
447	12.0069	453	10.0111			447	0.0519781	453	0.0455048		Grenville	900-1300
524	11.0152	529	3.03145			524	0.0476849	529	0.0137793		Anorogenic Craton	1300-1530
609	12.0042	600	13.0066			609	0.051966	600	0.0591207		Yavapai-Mazatzal	1550-1800
669	3.00907	1042	35.0029			669	0.0130263	1042	0.159104		Paleoproterozoic	1800-2000
761	3.01016	1136	16.0019			761	0.013031	1136	0.072736		Wopmay orogen	2000-2300
1056	41.0043	1183	17.0058			1056	0.177508	1183	0.077299		Archean craton	2400-3200
1156	13.004	1310	8.01708			1156	0.0562943	1310	0.0364413		Unknown	>3200
1228	12.0025	1365	9.00372			1228	0.051959	1365	0.040926
1310	5.00765	1440	18.001			1310	0.0216781	1440	0.0818228
1381	10.0055	1627	11.009			1381	0.0433141	1627	0.050041
1427	10.0142	1727	7.01721			1427	0.0433514	1727	0.0318964
1473	13.0036	1803	4.00445			1473	0.0562925	1803	0.018202
1531	5.00887	1879	7.01418			1531	0.0216834	1879	0.0318826
1664	14.0028	2020	3.0213			1664	0.0606184	2020	0.0137332
1730	12.0026	2579	3.00551			1730	0.0519592	2579	0.0136614
1794	4.02385	2689	5.01192			1794	0.0174193	2689	0.0227815
1866	5.01196					1866	0.0216968
	231.32		220.399

## Sheet: G. SP
Sawpit, CO
1Jes		2Jes		1Jw		2Jw		1Jmt			1Jes		2Jes		1Jw		2Jw		1Jmt
165	5.03125	162	7.04841	164	7.07528	257	4.0629	232	4.04841		165	0.0222622	162	0.0398215	164	0.0302363	257	0.0167197	232	0.0440044		Cordilleran back arc	145-165
209	5.03884	243	5.0242	211	6.01016	379	9.01431	412	5.00913		209	0.0222957	243	0.0283853	211	0.0256844	379	0.0370959	412	0.054447		Cordilleran arc	181-241
249	10.0108	323	12.0074	258	5.01619	416	14.0079	526	6.01577		249	0.0442956	323	0.0678387	258	0.0214367	416	0.0576457	526	0.0653888		Paleozoic Appalachian	285-504
361	9.00695	371	12.0056	300	3.02054	455	6.02962	608	3.02654		361	0.0398537	371	0.0678282	300	0.0129083	455	0.0248133	608	0.0328971		McClure Mtn. Syenite	512-529
414	12.013	414	18.0059	365	13.0086	519	53.0082	1023	15.0042		414	0.0531547	414	0.101728	365	0.0555923	519	0.218141	1023	0.163089		Neoproterozoic Appalachian	530-723
530	9.00586	539	13.0114	417	17.0108	604	14.0039	1092	13.0073		530	0.0398489	539	0.0735108	417	0.0726957	604	0.057629	1092	0.141384		Unknown	750-880
600	21.0034	610	13.0075	596	26.0048	1032	39.0025	1187	7.00391		600	0.0929353	610	0.0734886	596	0.111132	1032	0.160504	1187	0.0761294		Grenville	900-1300
932	4.01922	1064	41.0023	700	3.003	1155	35.0017	1405	8.01097		932	0.0177841	1064	0.231651	700	0.0128333	1155	0.14404	1405	0.0870758		Anorogenic Craton	1300-1530
1053	32.0047	1319	9.00285	791	4.01568	1317	8.00385	1636	8.00385		1053	0.141614	1319	0.0508635	791	0.017161	1317	0.0329376	1636	0.0869984		Yavapai-Mazatzal	1550-1800
1132	19.0012	1457	15.0028	1029	26.0042	1368	8.00286	1713	5.00466		1132	0.0840759	1457	0.0847615	1029	0.111129	1368	0.0329336	1713	0.0543985		Paleoproterozoic	1800-2000
1182	14.0049	1653	12.0095	1092	24.0039	1411	10.0015	1804	4.00113		1182	0.0619685	1653	0.06785	1092	0.102581	1411	0.0411584	1804	0.0434905		Wopmay orogen	2000-2300
1250	10.0015	1810	10.008	1217	14.0059	1451	12.0045	1891	4.01767		1250	0.0442546	1810	0.0565425	1217	0.0598542	1451	0.0494012	1891	0.0436703		Archean craton	2400-3200
1327	9.00495	2094	3.00437	1256	16.0029	1615	8.0018	2640	4.02674		1327	0.0398449	2094	0.0169738	1256	0.0683886	1615	0.0329292	2640	0.0437689		Unknown	>3200
1366	8.00503	2562	3.00555	1362	18.0028	1679	6.00907	2700	6.00309		1366	0.0354205	2562	0.0169805	1362	0.0769351	1679	0.0247287	2700	0.065251
1455	12.0102	2690	4.01549	1484	16.0054	1762	4.01877				1455	0.0531423	2690	0.0226864	1484	0.0683991	1762	0.0165381
1639	15.0066			1639	9.00431	1815	3.01931				1639	0.066401			1639	0.03848	1815	0.0124252
1767	13.0059			1784	10.0051	1958	4.0036				1767	0.0575483			1784	0.0427569	1958	0.0164757
1869	6.00303			1839	7.00284	2023	3.01192				1869	0.0265621			1839	0.0299267	2023	0.0123947
1983	4.01638			2094	7.00339	2685	3.00729				1983	0.0177716			2094	0.029929	2685	0.0123757
2079	3.022			2712	3.01122						2079	0.0133717			2712	0.0128685
2608	3.00866										2608	0.0133127
2679	3.02318										2679	0.0133769
	226.247		177.161		234.217		243.215		92.1833

## Sheet: Outcrops-DZ samples
	GPS LOCATION OF MEASURED OUTCROP SECTIONS IN STUDY SITES.
	S/No	Localities	Sampling purpose	Lat	Long
	1	Ten Mile Graben, UT	Sandstones (DZ)	38.8573	110.04
	2	Dewey Bridge, UT	Sandstones (DZ)	38.8194	109.285
	3	Rabbit Valley, CO	Sandstones (DZ)	39.174	109.011
	5	Pollock Bench, CO	Sandstones (DZ)	39.1521	108.782
	6	Ribbon Trail, CO	Paleosols	39.0113	108.619
	7	Duncan Trail, CO	Sandstones (DZ)	38.6506	107.864
	8	Chukar Trail, CO	Sandstones (DZ)	38.6181	107.836
	9	Escalante Canyon, CO	Paleosols	38.7105	108.278
	10	Sawpit, CO	Sandstones (DZ) and paleosols	37.957	107.929
		Analyses:
		DZ - detrital zircon geochronology
